# Supplementary material for: From carbon nanotubes and silicate layers to graphene platelets for polymer nanocomposites
Source: Royal Society of Chemistry journal article supplement (doi:10.1039/c2nr30837a), 2012-01-01
Supplement: c2nr30837a.pdf [file c2nr30837a.pdf]

## Electronic Supplementary Information

### From carbon nanotubes and silicate layers to graphene platelets for polymer nanocomposites

Table S1 Comparison of ours with previous studies of toughening epoxy using clay and carbon nanotubes.

| Materials with optimum fraction | Filler concentration | Modulus increase (%) | Maximum $K_{Ic}$ increase (%) | Maximum $G_{Ic}$ increase (%) | Maximum $T_g$ increase (%) | Ref. |
|---------------------------------|----------------------|----------------------|-------------------------------|-------------------------------|----------------------------|------|
| Epoxy/graphene                  | 1.0–2.0 vol%         | 11.8%                | 167.4%                        | 573.0%                        | 6.9%                       | Ours |
| Epoxy/clay                      | 2.5 wt%              | 16.7%                | 58.5%                         | 114.9%                        | 6.4%                       | [1]  |
| Epoxy/clay                      | 3.5–7.0wt%           | 2.8%                 | 67.1%                         | 158.3%                        | N/A                        | [2]  |
| Epoxy/MWCNT                     | 0.3–0.5 wt%          | 6.9%                 | 23.1%                         | N/A                           | N/A                        | [3]  |
| Epoxy/MWCNT                     | 0.2–0.5 wt%          | 12.4%                | 42.0%                         | 67.7%                         | -2.0%                      | [4]  |

## References

- [1] I. Zaman, Q. Le, H. C. Kuan, N. Kawashima, L. Luong, A. Gerson and J. Ma, *Polymer*, 2011, **52**, 497–504.
- [2] A. S. Zerda and A. J. Lesser, *J. Polym. Sci. Pol. Phys.*, 2001, **39**, 1137–1146.
- [3] F. H. Gojny, M. H. G. Wichmann, B. Fiedler and K. Schulte, *Compos. Sci. Technol.*, 2005, **65**, 2300–2313.
- [4] T. H. Hsieh, A. J. Kinloch, A. C. Taylor and I. A. Kinloch, *J. Mater. Sci.*, 2011, **46**, 7525–7535.
